# Supplementary material for: Increased women’s empowerment and regional inequality in Sub-Saharan Africa between 1995 and 2015
Source: PubMed Central journal article supplement (PMC9473440; doi:10.1371/journal.pone.0272909), 2022-09-14
Supplement: pone.0272909.s001.pdf [file pone.0272909.s001.pdf]

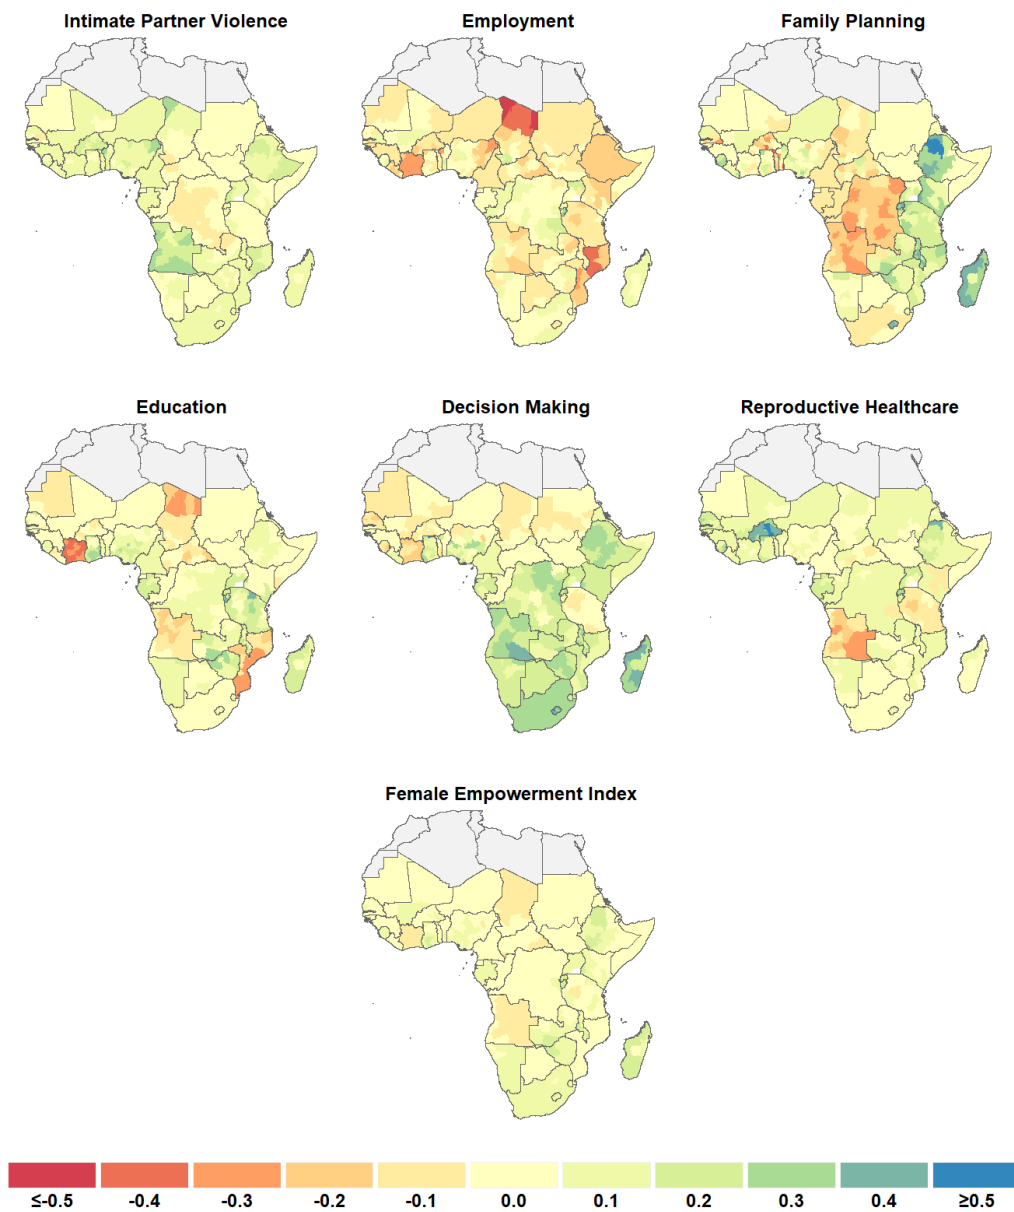

**S1 Fig. Change in Female Empowerment Index and Domain scores between 1995 and 2015.** For first-level administrative subdivisions in Sub-Saharan African countries.
