# Supplementary material for: Increased women’s empowerment and regional inequality in Sub-Saharan Africa between 1995 and 2015
Source: PubMed Central journal article supplement (PMC9473440; doi:10.1371/journal.pone.0272909), 2022-09-14
Supplement: pone.0272909.s002.pdf [file pone.0272909.s002.pdf]

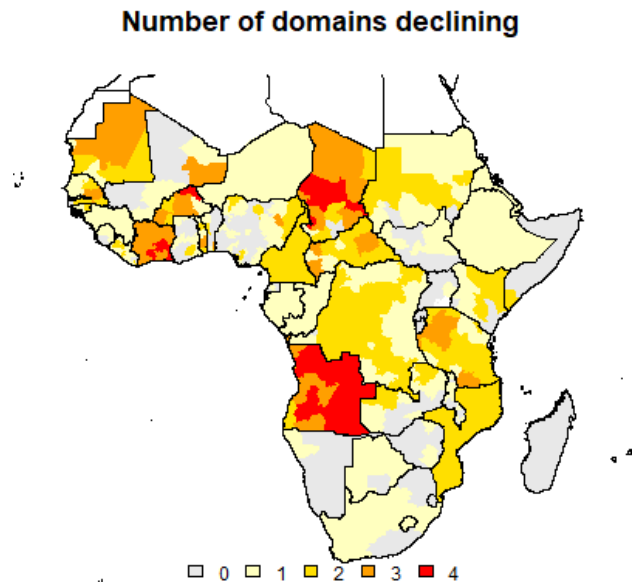

**S2 Fig. The number of domains experiencing a decline in value between 1995 and 2015. For first-level administrative subdivisions in Sub-Saharan African countries.**
