# Supplementary material for: Increased women’s empowerment and regional inequality in Sub-Saharan Africa between 1995 and 2015
Source: PubMed Central journal article supplement (PMC9473440; doi:10.1371/journal.pone.0272909), 2022-09-14
Supplement: pone.0272909.s003.pdf [file pone.0272909.s003.pdf]

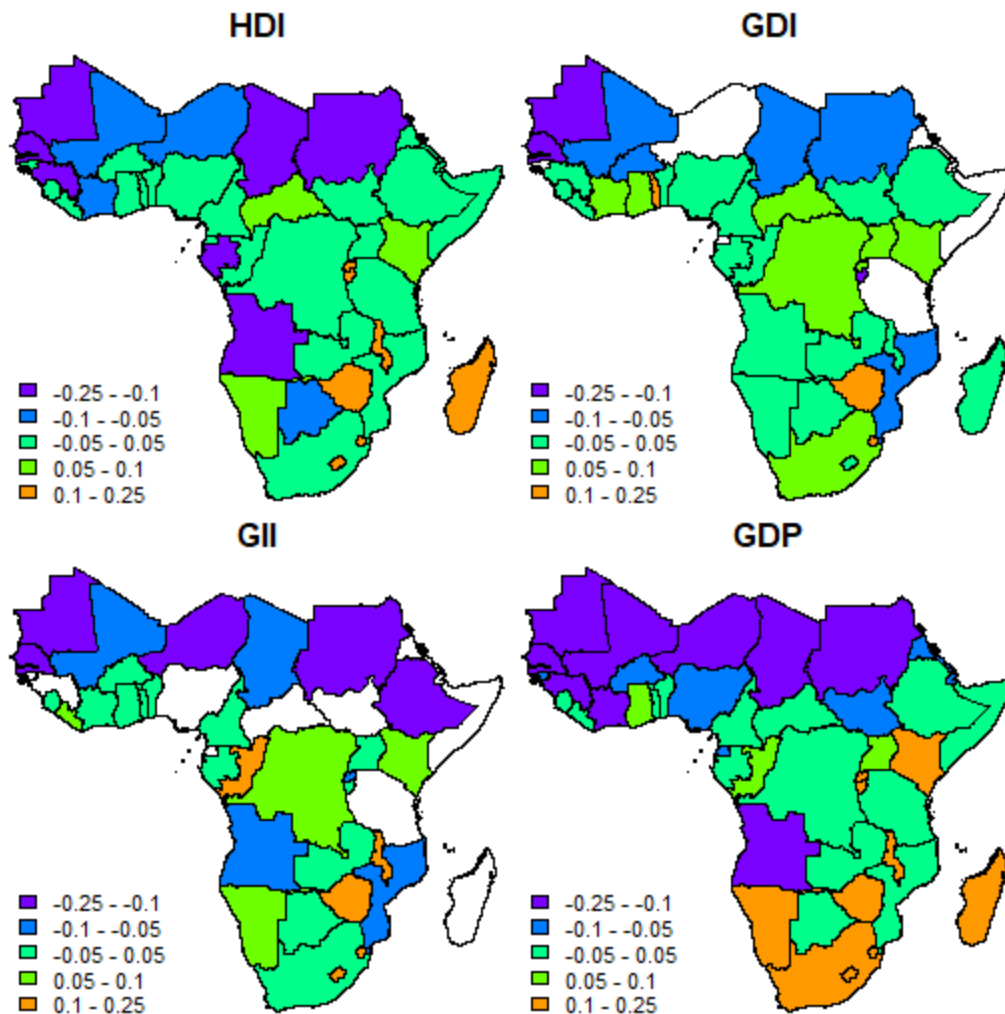

**S3 Fig. Model residuals for linear regression models.** Models of the Female Empowerment Index as a function of the Human Development Index (HDI), Gender Development Index (GDI) Gender Inequality Index (GDI), and the Gross Domestic Product (GDP), for each country in sub-Saharan Africa in 2015. Countries colored in white indicate that the corresponding variable was not available for that country.
