# Supplementary material for: Increased women’s empowerment and regional inequality in Sub-Saharan Africa between 1995 and 2015
Source: PubMed Central journal article supplement (PMC9473440; doi:10.1371/journal.pone.0272909), 2022-09-14
Supplement: pone.0272909.s004.pdf [file pone.0272909.s004.pdf]

**S1 Table. Survey data used, by country and year.** All survey data are Demographic and Health Surveys (<https://dhsprogram.com/>)

| Country                          | Survey Years                                        |
|----------------------------------|-----------------------------------------------------|
| Angola                           | 2015                                                |
| Benin                            | 1996, 2001, 2006, 2011, 2017                        |
| Botswana                         | -                                                   |
| Burkina Faso                     | 1993, 1998, 2003, 2010                              |
| Burundi                          | 2010, 2016                                          |
| Cameroon                         | 1991, 1998, 2004, 2011, 2018                        |
| Central African Republic         | 1994                                                |
| Comoros                          | 1996, 2012                                          |
| Côte d'Ivoire                    | 1994, 1998, 2011                                    |
| Democratic Republic of the Congo | 2007, 2013                                          |
| Djibouti                         | -                                                   |
| Ethiopia                         | 2000, 2005, 2011, 2016                              |
| Equatorial Guinea                | -                                                   |
| Gabon                            | 2000, 2012                                          |
| Gambia                           | 2013                                                |
| Ghana                            | 1988, 1993, 1998, 2003, 2008, 2014                  |
| Guinea                           | 1999, 2005, 2012, 2018                              |
| Guinea-Bissau                    | -                                                   |
| Kenya                            | 1989, 1993, 1998, 2003, 2008, 2014                  |
| Lesotho                          | 2004, 2009, 2014                                    |
| Liberia                          | 1986, 2007, 2013                                    |
| Madagascar                       | 1992, 1997, 2003, 2008                              |
| Malawi                           | 1992, 2000, 2004, 2010, 2015                        |
| Mali                             | 1987, 1995, 2001, 2006, 2012, 2018                  |
| Mauritania                       | 2000                                                |
| Mozambique                       | 1997, 2003, 2011                                    |
| Namibia                          | 1992, 2000, 2006, 2013                              |
| Niger                            | 1992, 1998, 2006, 2012                              |
| Nigeria                          | 1990, 1999, 2003, 2008, 2013, 2018                  |
| Republic Of Congo                | 2005, 2011                                          |
| Rwanda                           | 1992, 2000, 2005, 2010, 2014                        |
| São Tomé And Príncipe            | 2008                                                |
| Senegal                          | 1986, 1992, 1997, 2005, 2010, 2012, 2015, 2016-2019 |
| Sierra Leone                     | 2008, 2013, 2019                                    |
| Somalia                          | -                                                   |
| South Africa                     | 1998, 2016                                          |
| South Sudan                      | -                                                   |
| Sudan                            | 1989                                                |

|           |                                    |
|-----------|------------------------------------|
| Swaziland | 2006                               |
| Tanzania  | 1991, 1996, 1999, 2004, 2010       |
| Togo      | 1988, 1998, 2013                   |
| Uganda    | 1988, 1995, 2000, 2006, 2011, 2016 |
| Zambia    | 1992, 1996, 2001, 2007, 2013       |
| Zimbabwe  | 1988, 1994, 1999, 2005, 2010, 2015 |

---
